# Supplementary material for: Synergistic effects of MOF-76 on layered double hydroxides with superior activity for extractive catalytic oxidative desulfurization
Source: Royal Society of Chemistry journal article supplement (doi:10.1039/d0nj00612b), 2020-01-01
Supplement: d0nj00612b1.pdf [file d0nj00612b1.pdf]

## Electronic Supplementary Information

### Synergistic effects of MOF-76 on layered double hydroxides with superior activity for extractive catalytic oxidative desulfurization

*Siqi Liu<sup>a</sup>, Xiaonan Li<sup>a</sup>, Hong Zhang<sup>a,\*</sup>*

<sup>a</sup> Institute of Polyoxometalate Chemistry, Department of Chemistry, Northeast Normal University, Changchun, Jilin 130024, P. R. China

Fax: +86-0431-85098827; Tel: +86-0431-85099372;

E-mail: hope20130122@163.com, [zhangh@nenu.edu.cn](mailto:zhangh@nenu.edu.cn)

#### Table of content

**Fig S1:** The preparation process of the MOF76@LDH.

**FigS2:** Fluorescence spectra of MOF76, LDH and MOF76@LDH.

**FigS3:** The structure of the MOF76.

**FigS4:** High-resolution Mg 2p and Ca 2p XPS spectrum of MOF76@LDH.

**FigS5:** Desulfurization kinetics of sulfur removal of DBT.

**Table S1:** The composition of MOF76@LDH composites, which was calculated from the ICP.

**Table S2:** The atomic ratio of Ca, Mg and Al was determined by ICP measurement.

The BET surface areas, pore volume and pore width of the 49 wt.% MOF76@LDH catalyst.

**Table S3:** Structures and sizes of the typical aromatic organosulfur compounds.

**Table S4:** The removal of DBT in various ODS systems with different apparent activation energies.

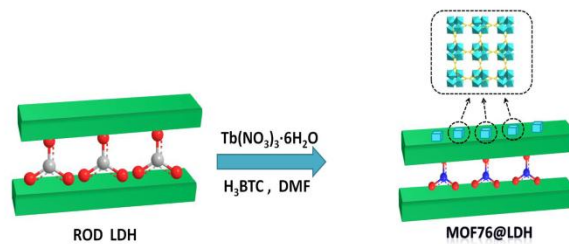

**FigS1:** The preparation process of the MOF76@LDH.

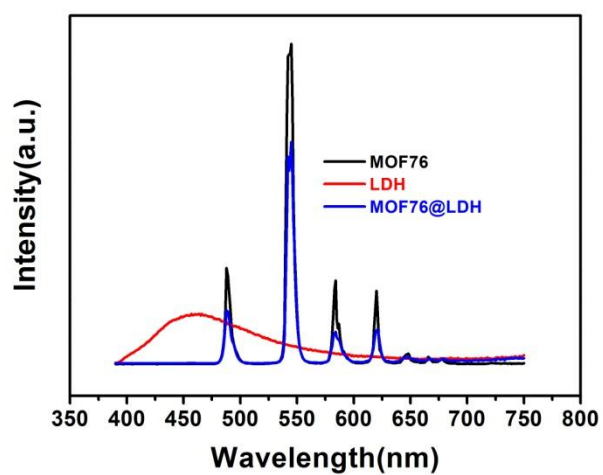

**Fig S2:** Fluorescence spectra of MOF76, LDH and MOF76@LDH.

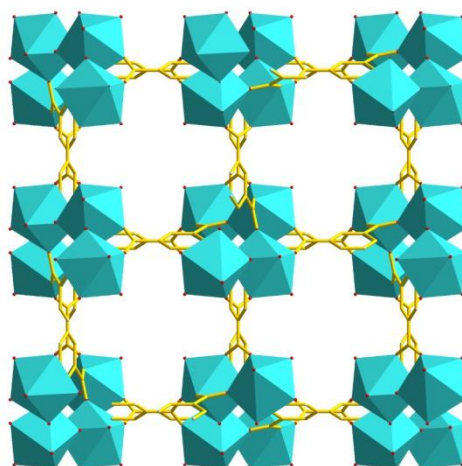

**FigS3:** The structure of the MOF76.

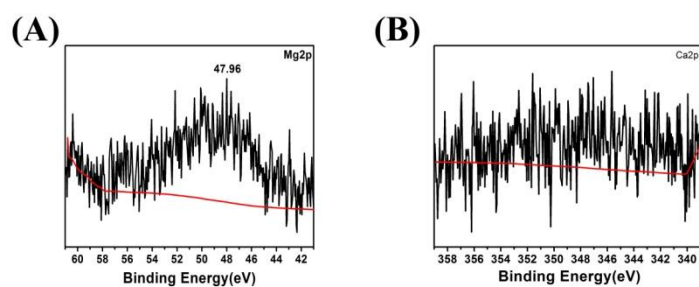

**FigS4:** High-resolution Mg 2p and Ca 2p XPS spectrum of MOF76@LDH.

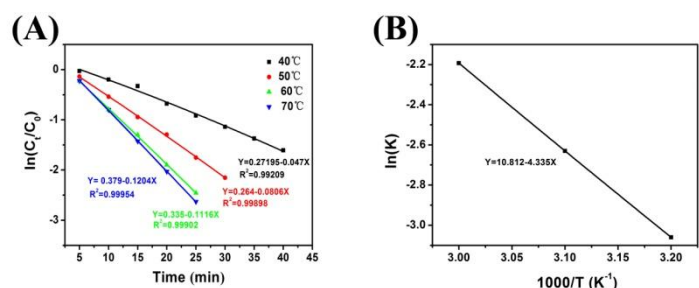

**FigS5:** Desulfurization kinetics of sulfur removal of DBT

| LDH supporter | MOF76 addition amount(mg) | The weight percent in the composite tested by ICP(%) |      | Tb/Ca molar ratio | MOF weight percent in the composite(%) | The denotation of composite |
|---------------|---------------------------|------------------------------------------------------|------|-------------------|----------------------------------------|-----------------------------|
|               |                           | Ca                                                   | Tb   |                   |                                        |                             |
| LDH           | 47                        | 0.65                                                 | 1.85 | 0.7156            | 40                                     | 40% wt.MOF76@LDH            |
| LDH           | 70                        | 0.61                                                 | 2.07 | 0.8563            | 45                                     | 45% wt.MOF76@LDH            |
| LDH           | 100                       | 0.53                                                 | 2.06 | 0.9782            | 49                                     | 49% wt.MOF76@LDH            |
| LDH           | 117                       | 0.63                                                 | 2.44 | 0.9694            | 49                                     | 49% wt.MOF76@LDH            |
| LDH           | 141                       | 0.52                                                 | 2.04 | 0.9778            | 49                                     | 49% wt.MOF76@LDH            |

**Table S1:** The composition of MOF76@LDH composites, which was calculated from the ICP.

| Catalyst  | Ca:Mg:Al       | BET surface area(m <sup>2</sup> g <sup>-1</sup> ) | Pore volume(cm <sup>3</sup> g <sup>-1</sup> ) | Pore width(nm) |
|-----------|----------------|---------------------------------------------------|-----------------------------------------------|----------------|
| MOF76@LDH | 0.03:0.36:0.51 | 72.019                                            | 0.183                                         | 0.673, 0.814   |

**Table S2:** The atomic ratio of Ca, Mg and Al was determined by ICP measurement. The BET surface areas, pore volume and pore width of the 49% wt.MOF76@LDH catalyst.

| substrate | structure                                                                         | size            |
|-----------|-----------------------------------------------------------------------------------|-----------------|
| BT        | 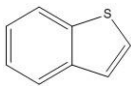 | 3.62×5.51×6.51Å |
| DBT       |  | 3.62×5.57×7.86Å |
| 4,6-DMDBT |  | 3.62×6.17×7.86Å |

**Table S3:** Structures and sizes of the typical aromatic organosulfur compounds.

| Entry | Catalyst                       | Ea(KJ/mol) | Sulfur removal% |
|-------|--------------------------------|------------|-----------------|
| 1     | MIL-47                         | 51         | 99.9            |
| 2     | PTA@MOF-808A                   | 29         | 100             |
| 3     | PTA@MIL101(Al)-NH <sub>2</sub> | 34.1       | 100             |
| 4     | MDC-C                          | 19         | 97.1            |
| 5     | MDC-P                          | 25         | 96.8            |
| 6     | MOF808                         | 22         | 100             |
| 7     | MOF76@LDH                      | 10.81      | 100             |

**Table S4:** The removal of DBT in various ODS systems with different apparent activation energies.
